# Supplementary material
Source: Elsevier journal article supplement (https://discovery-pp.ucl.ac.uk/1465321/2/mmc1.pdf)
Supplement: mmc1 [file mmc1.pdf]

# THE LANCET Psychiatry

## Supplementary appendix

This appendix formed part of the original submission and has been peer reviewed. We post it as supplied by the authors.

Supplement to: Killaspy H, Marston L, Green N, et al. Clinical effectiveness of a staff training intervention in mental health inpatient rehabilitation units designed to increase patients' engagement in activities (the Rehabilitation Effectiveness for Activities for Life [REAL] study): single-blind, cluster-randomised controlled trial. *Lancet Psychiatry* 2014; published online Dec 16. [http://dx.doi.org/10.1016/S2215-0366\(14\)00050-9](http://dx.doi.org/10.1016/S2215-0366(14)00050-9).

| <b>Travel and accommodation cost</b>                         | <b>Days spent at each unit</b>           | <b>Reimbursement per day (£)</b>    | <b>Product</b> |
|--------------------------------------------------------------|------------------------------------------|-------------------------------------|----------------|
| Occupational Therapist                                       | 25                                       | 100                                 | 2500           |
| Activity Worker                                              | 25                                       | 100                                 | 2500           |
| Patient Expert                                               | 3                                        | 100                                 | 300            |
| <b>Salary cost</b>                                           | <b>Days spent at each unit</b>           | <b>Cost per working day in £*</b>   | <b>Product</b> |
| Occupational Therapist                                       | 25                                       | 188                                 | 4689           |
| Activity Worker                                              | 25                                       | 111                                 | 2766           |
| Patient Expert                                               | 3                                        | 111                                 | 332            |
| <b>Opportunity cost of staff attending training sessions</b> | <b>Number of staff-hours trained</b>     | <b>(Weighted) cost per hour (£)</b> | <b>Product</b> |
| Nurses                                                       | 48                                       | 39                                  | 1871           |
| Support Workers                                              | 57                                       | 21                                  | 1189           |
| Occupational Therapist                                       | 8                                        | 36                                  | 278            |
| Other                                                        | 9                                        | 85                                  | 875            |
|                                                              | Total (£)                                |                                     | 17300          |
|                                                              | Average no of occupied beds              |                                     | 14.2           |
|                                                              | Assumed longevity of treatment in months |                                     | 12             |
|                                                              | Average cost per patient per month (£)   |                                     | 102            |

\* Excludes non-staff cost and capital overheads as these are thought to be negligible during the intervention.

**Webtable 1: Cost of the intervention**

| Staff type                 | Standard care units |                                 |                                   | GetREAL units   |                                 |                                   |
|----------------------------|---------------------|---------------------------------|-----------------------------------|-----------------|---------------------------------|-----------------------------------|
|                            | % using service     | Mean (SE) contacts <sup>†</sup> | Mean (SE) costs in £ <sup>‡</sup> | % using service | Mean (SE) contacts <sup>†</sup> | Mean (SE) costs in £ <sup>‡</sup> |
| Psychiatrist               | 48                  | 1.9 (0.1)                       | 107 (9)                           | 47              | 2 (0.1)                         | 105 (9)                           |
| Other medical specialist   | 21                  | 2 (0.2)                         | 44 (6)                            | 25              | 2 (0.1)                         | 50 (6)                            |
| Clinical Psychologist      | 12                  | 2.9 (0.3)                       | 22 (4)                            | 12              | 3 (0.2)                         | 18 (3)                            |
| Occupational Therapist     | 25                  | 6.9 (0.6)                       | 9 (1)                             | 32              | 8 (0.6)                         | 14 (2)                            |
| Social Worker              | 8                   | 1.7 (0.2)                       | 16 (4)                            | 11              | 2 (0.2)                         | 21 (4)                            |
| Counsellor/psychotherapist | 1                   | 2.7 (0.7)                       | 1 (1)                             | 1               | 3 (0.4)                         | 2 (1)                             |
| Volunteer                  | 4                   | 2.7 (0.6)                       | 1 (0)                             | 4               | 4 (0.4)                         | 1 (0)                             |
| Art/music/dance therapist  | 1                   | 3.3 (0.8)                       | 1 (0)                             | 2               | 4 (1.1)                         | 1 (0)                             |
| Care coordinator           | 11                  | 1.9 (0.2)                       | 6 (1)                             | 14              | 2 (0.2)                         | 8 (1)                             |
| Other                      | 4                   | 2.6 (0.5)                       | 6 (2)                             | 5               | 2 (0.4)                         | 5 (2)                             |
| Nurse*                     | 99                  | 8.3 (0.3)                       | 614 (24)                          | 100             | 9 (0.4)                         | 690 (30)                          |
| Support worker*            | 81                  | 7 (0.8)                         | 147 (16)                          | 85              | 7 (0.7)                         | 145 (14)                          |
| Total                      |                     |                                 | 973 (35)                          |                 |                                 | 1059 (39)                         |

<sup>†</sup> Among those using the service

<sup>‡</sup> Among the whole sample

\*Hours of contact

**Webtable 2: Service use and cost in standard care and intervention units over 1 month**

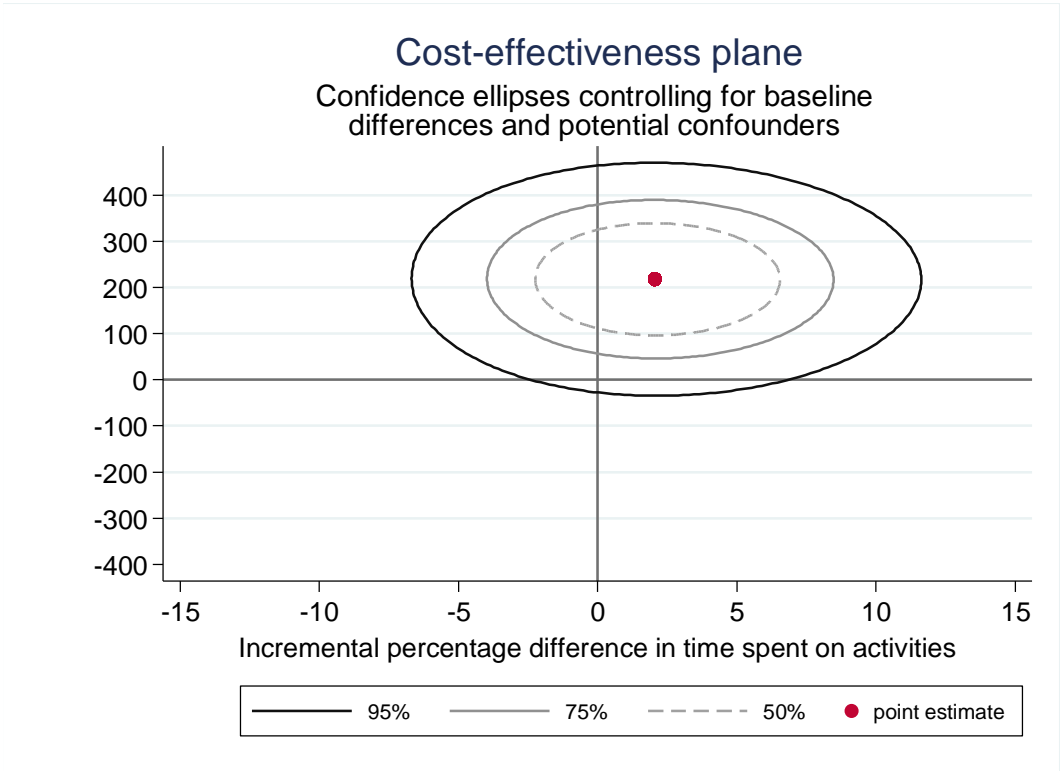

**Webfigure 1: Cost-effectiveness plane**

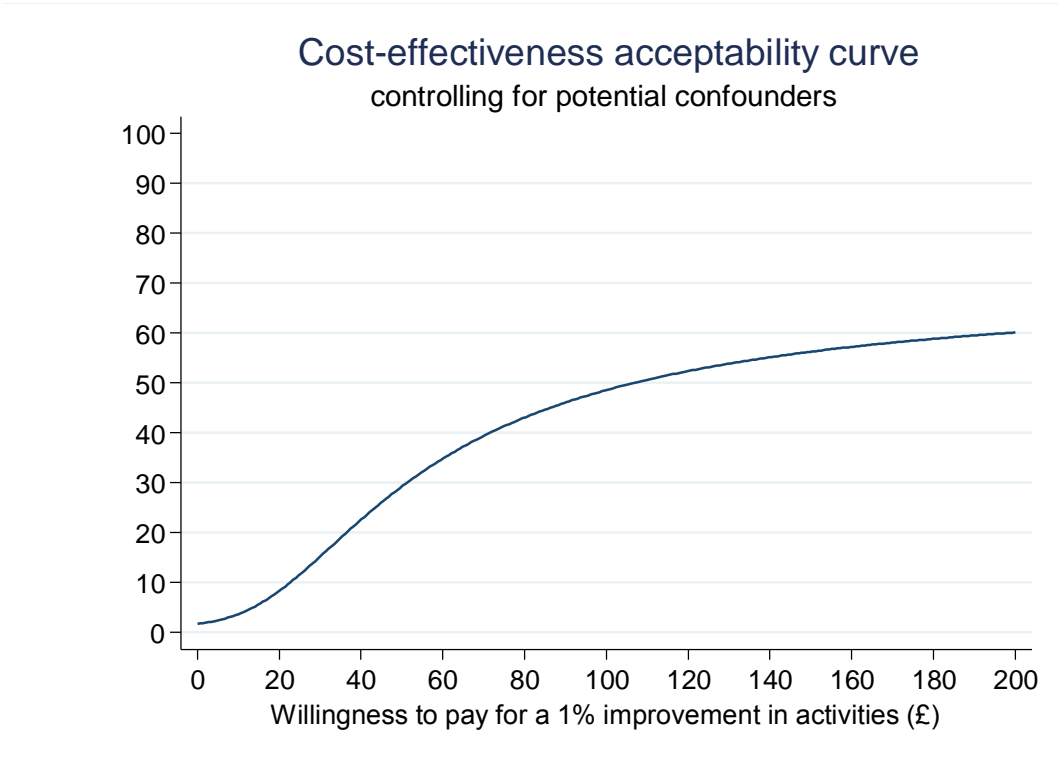

**Webfigure 2: Cost-effectiveness acceptability curve**

| <b>Site</b>                                                         | <b>Local Principal Investigator</b> | <b>GetREAL Intervention or Standard Care</b> | <b>Participant recruitment at baseline</b> | <b>Participant recruitment at 12 months</b> | <b>Total participant recruitment</b> |
|---------------------------------------------------------------------|-------------------------------------|----------------------------------------------|--------------------------------------------|---------------------------------------------|--------------------------------------|
| Leicestershire Partnership NHS Trust                                | Harry Andrews                       | Standard care                                | 26                                         | 15                                          | 41                                   |
| West London Mental Health Trust                                     | Nicholas Broughton                  | GetREAL                                      | 22                                         | 18                                          | 40                                   |
| South West Yorkshire Mental Health NHS Trust                        | Sara Davies                         | GetREAL                                      | 25                                         | 12                                          | 37                                   |
| Mersey Care NHS Trust                                               | Clare Brabbins                      | Standard care                                | 14                                         | 18                                          | 32                                   |
| Nottinghamshire Healthcare NHS Trust # 1                            | Beverly Johnson                     | Standard care                                | 16                                         | 11                                          | 27                                   |
| Oxleas NHS Trust                                                    | Melanie Bunyan                      | Standard care                                | 14                                         | 13                                          | 27                                   |
| Oxfordshire and Buckinghamshire Mental Health Partnership NHS Trust | Janet Patterson                     | Standard care                                | 19                                         | 7                                           | 26                                   |
| Leeds Partnership NHS Foundation Trust                              | Robin Balmer                        | Standard care                                | 13                                         | 13                                          | 26                                   |
| Penine Care NHS Foundation Trust #1                                 | George Edgley                       | GetREAL                                      | 11                                         | 14                                          | 25                                   |
| Central And North West London Mental Health NHS Trust               | Michael Crawford                    | Standard care                                | 11                                         | 12                                          | 23                                   |
| South London and Maudsley NHS Foundation Trust # 1                  | Thomas Craig                        | GetREAL                                      | 13                                         | 10                                          | 23                                   |
| South London And Maudsley NHS Foundation Trust # 2                  | Thomas Craig                        | Standard care                                | 11                                         | 10                                          | 21                                   |
| Penine Care NHS Trust #2                                            | George Edgley                       | GetREAL                                      | 10                                         | 11                                          | 21                                   |
| Camden And Islington Mental Health And Social Care Trust            | David Osborn                        | GetREAL                                      | 14                                         | 5                                           | 19                                   |
| Manchester Mental Health And Social Care Trust                      | Richard Drake                       | GetREAL                                      | 8                                          | 11                                          | 19                                   |
| Coventry & Warwickshire Mental Health Partnership Trust # 1         | Scott Weich                         | Standard care                                | 8                                          | 11                                          | 19                                   |
| Lincolnshire Partnership NHS Trust                                  | Ann Dodd                            | Standard care                                | 12                                         | 6                                           | 18                                   |

|                                                             |                    |               |    |    |    |
|-------------------------------------------------------------|--------------------|---------------|----|----|----|
| # 1                                                         |                    |               |    |    |    |
| Somerset Partnership NHS And Social Care Trust              | John Barnes        | GetREAL       | 9  | 9  | 18 |
| Sheffield Health & Social Care NHS Foundation Trust # 1     | Adrian Carr        | Standard care | 8  | 10 | 18 |
| Surrey and Borders Partnership NHS Trust                    | Deborah Noakes     | GetREAL       | 8  | 9  | 17 |
| Dorset Health Care NHS Trust                                | Leyland Shepherd   | GetREAL       | 10 | 7  | 17 |
| Northumberland, Tyne and Wear NHS Trust # 1                 | Josie Quinn        | GetREAL       | 10 | 6  | 16 |
| Bradford District Care Trust                                | Jane Clarke        | Standard care | 6  | 10 | 16 |
| Nottinghamshire Healthcare NHS Trust # 2                    | Beverley Johnson   | GetREAL       | 9  | 7  | 16 |
| Lincolnshire Partnership NHS Trust # 2                      | Ann Dodd           | Standard care | 11 | 5  | 16 |
| South West London And St George's Mental Health NHS Trust   | Charlotte Harrison | Standard care | 9  | 6  | 15 |
| Plymouth NHS Trust                                          | Elizabeth Adams    | Standard care | 8  | 7  | 15 |
| Cornwall Partnership NHS Trust                              | Richard Laugharne  | GetREAL       | 8  | 7  | 15 |
| Worcestershire Mental Health Partnership NHS Trust          | Debbie Bradley     | Standard care | 7  | 8  | 15 |
| Sheffield Health & Social Care NHS Foundation Trust # 2     | Adrian Carr        | Standard care | 7  | 6  | 13 |
| Avon And Wiltshire Mental Health Partnership NHS Trust      | Eileen O'Sullivan  | GetREAL       | 7  | 6  | 13 |
| Kent and Medway NHS and Social Care Partnership Trust       | Niki Loft          | GetREAL       | 5  | 7  | 12 |
| Coventry & Warwickshire Mental Health Partnership Trust # 2 | Scott Weich        | Standard care | 7  | 5  | 12 |
| Northamptonshire Healthcare NHS Trust                       | Steffan Davies     | GetREAL       | 6  | 6  | 12 |

|                                                                         |                   |               |   |    |    |
|-------------------------------------------------------------------------|-------------------|---------------|---|----|----|
| Berkshire Healthcare NHS Foundation Trust                               | Julia Nehring     | Standard care | 7 | 5  | 12 |
| Northumberland Tyne & Wear NHS Foundation Trust # 2                     | Josie Quinn       | GetREAL       | 5 | 7  | 12 |
| Greater Manchester West Mental Health NHS Foundation Trust              | Thomas Haslam     | Standard care | 5 | 6  | 11 |
| Penine Care NHS Foundation Trust                                        | George Edgley     | Standard care | 6 | 4  | 10 |
| Rotherham Doncaster and South Humber Mental Health NHS Foundation Trust | Deborah Wildgoose | GetREAL       | 9 | 0* | 9  |
| Northumberland Tyne & Wear NHS Foundation Trust # 3                     | Josie Quinn       | GetREAL       | 3 | 4  | 7  |

# Trusts where more than one unit was recruited

\*Unit closed during the study hence no participants recruited at 12 months

**Webtable 3: Principal investigators and recruitment at every site**
